# Supplementary material
Source: PubMed Central journal article supplement (PMC6763976)
Supplement: jamaotolaryngolheadnecksurg-145-1053-s001.pdf [file jamaotolaryngolheadnecksurg-145-1053-s001.pdf]

## Supplementary Online Content

Hutcheson KA, Warneke CL, Yao CMKL, et al. Dysphagia after primary transoral robotic surgery with neck dissection vs nonsurgical therapy in patients with low- to intermediate-risk oropharyngeal cancer. *JAMA Otolaryngol Head Neck Surgery*. Published online September 26, 2019. doi:10.1001/jamaoto.2019.2725

**eTable 1.** Methods Used in Study Analysis for Two-Group Comparisons

**eTable 2.** MDASI-HN Swallow Item Differences in Least Squares Means Between Pre-treatment Groups by Time Point Among 219 Patients Who Received Radiotherapy

**eTable 3.** Primary Treatment Modality and 3-6 Month Dysphagia by TN-Stage, n = 257\*

This supplementary material has been provided by the authors to give readers additional information about their work.

| <b>Supplementary Table 1. Methods used in Study Analysis for Two-Group Comparisons</b> |                                                                                                             |                                                               |                                                                                                             |                                                                                           |
|----------------------------------------------------------------------------------------|-------------------------------------------------------------------------------------------------------------|---------------------------------------------------------------|-------------------------------------------------------------------------------------------------------------|-------------------------------------------------------------------------------------------|
| <b>Groups</b>                                                                          | Independent                                                                                                 | Independent                                                   | Paired                                                                                                      | Paired                                                                                    |
| <b>Variable Type</b>                                                                   | Ordinal or non-normal continuous                                                                            | Nominal                                                       | Ordinal or non-normal continuous                                                                            | Nominal                                                                                   |
| <b>Group point Estimate</b>                                                            | Median (IQR), min/max                                                                                       | Percent with exact binomial CIs                               | Proportion worse, same, better + exact (Clopper-Pearson) binomial CIs                                       | Proportion worse, same, better + exact binomial Clopper-Pearson) CIs                      |
| <b>Difference</b>                                                                      | Hodges-Lehmann estimator of location shift with 95% CI                                                      | P1-P2 (i.e., raw difference)                                  |                                                                                                             |                                                                                           |
| <b>DifferenceReference</b>                                                             | Hodges & Lehmann (1983)                                                                                     | Fleiss (1981, p. 29).                                         | --                                                                                                          | --                                                                                        |
| <b>Test</b>                                                                            | Wilcoxon rank sum test                                                                                      | 1) Fisher's exact test,<br>2) Univariable logistic regression | Wilcoxon signed-rank test                                                                                   | McNemar test with continuity correction                                                   |
| <b>Effect size</b>                                                                     | $r$ [Z divided by the square root of total observations]                                                    | 1) Cramer's Z<br>2) Odds ratio                                | $r$ [Z divided by the square root of total observations]                                                    | Cohen's $g$                                                                               |
| <b>Effect size CIs</b>                                                                 | Bootstrap                                                                                                   | 1) Bootstrap bias-corrected CIs                               | Bootstrap                                                                                                   | 95% CIs                                                                                   |
| <b>Effect size reference</b>                                                           | (Rosenthal, 1991, p. 19).                                                                                   | 1) Cramér (1946)                                              | (Rosenthal, 1991, p. 19).                                                                                   | Cohen (1988)                                                                              |
| <b>Effect size interpretation</b>                                                      | small (.10 to < .30)<br>medium (.30 to < .50)<br>large ( $\geq$ .50)<br>Rosenthal added: very large (> .70) | (Depends on degrees of freedom)                               | small (.10 to < .30)<br>medium (.30 to < .50)<br>large ( $\geq$ .50)<br>Rosenthal added: very large (> .70) | negligible (<.05)<br>small (.05 to < .15)<br>medium (.15 to < .25)<br>large ( $\geq$ .25) |
| <b>Interpretation reference</b>                                                        | Cohen (1988)p. 79-80<br>Rosenthal (1996)                                                                    | Cohen (1988) p. 222                                           | Cohen (1988)p. 79-80<br>Rosenthal (1996)                                                                    | Cohen (1988)                                                                              |

Clopper, C. J., and Pearson, E. S. (1934), "The Use of Confidence or Fiducial Limits Illustrated in the Case of the Binomial," *Biometrika* 26, 404–413

Cohen, J. 1988. *Statistical Power Analysis for the Behavioral Sciences*, 2nd Edition. Routledge

Cramér, Harald. 1946. *Mathematical Methods of Statistics*. Princeton: Princeton University Press, page 282

Fleiss, J. L. (1981). *Statistical Methods for Rates and Proportions*, New York: John Wiley & Sons, Inc.

Hodges, J. L., Jr. and Lehmann, E. L. (1983). "Hodges-Lehmann Estimators," in *Encyclopedia of Statistical Sciences*, vol. 3, ed. S. Kotz, N. L. Johnson, and C. B. Read, New York: John Wiley & Sons, 463–465.

Rosenthal, R. (1991). *Meta-analytic procedures for social research*. Newbury Park, CA: Sage.

Rosenthal, J.A. (1996), "Qualitative descriptors of strength of association and effect size," *Journal of Social Service Research*, 21(4): 37-59.

Supplementary Table 2. MDASI-HN swallow item differences in least squares means between pre-treatment groups by time point among 219 patients who received radiotherapy.

| Time Point              | Pre-RT status  | Comparator Group | Estimate | 95% CI  |        |
|-------------------------|----------------|------------------|----------|---------|--------|
| RT start                | Post-TORS      | Post-induction   | 2.5839   | 0.3708  | 4.7969 |
|                         | Post-TORS      | Treatment naive  | 1.6599   | 1.0438  | 2.2759 |
|                         | Post-induction | Treatment naive  | -0.9240  | -3.1357 | 1.2877 |
| RT end                  | Post-TORS      | Post-induction   | -0.2026  | -0.7316 | 0.3264 |
|                         | Post-TORS      | Treatment naive  | -0.2791  | -0.5638 | 0.0056 |
|                         | Post-induction | Treatment naive  | -0.0765  | -0.5439 | 0.3909 |
| 6-Months post-treatment | Post-TORS      | Post-induction   | 0.0857   | -0.6600 | 0.8315 |
|                         | Post-TORS      | Treatment naive  | -0.0421  | -0.4980 | 0.4138 |
|                         | Post-induction | Treatment naive  | -0.1278  | -0.7897 | 0.5341 |

Estimates adjusted for baseline MDASI-swallow score, patient age, and concurrent chemotherapy.

Supplementary Table 3. Primary treatment modality and 3-6 month dysphagia by TN-Stage, n = 257\*

| TN-stage<br>of primary | Total    |              | RT             |              |          |              | TORS           |              |          |              | Missing<br><i>n</i> |         |    |
|------------------------|----------|--------------|----------------|--------------|----------|--------------|----------------|--------------|----------|--------------|---------------------|---------|----|
|                        | <i>n</i> | ( <i>%</i> ) | 3-6M Dysphagia |              | <i>n</i> | ( <i>%</i> ) | 3-6M Dysphagia |              | <i>n</i> | ( <i>%</i> ) |                     |         |    |
|                        |          |              | <i>n</i>       | ( <i>%</i> ) |          |              | <i>n</i>       | ( <i>%</i> ) |          |              |                     |         |    |
| T1N0                   | 17       | (6.61)       | 10/13          | (0.00)       | 3        | (17.65)      | 0/3            | (0.00)       | 14       | (82.35)      | 0/10                | (0.00)  | 4  |
| T1N1                   | 18       | (7.00)       | 0/15           | (0.00)       | 9        | (50.00)      | 0/7            | (0.00)       | 9        | (50.00)      | 0/8                 | (0.00)  | 3  |
| T1N2a                  | 12       | (4.67)       | 0/11           | (0.00)       | 10       | (83.33)      | 0/10           | (0.00)       | 2        | (16.67)      | 0/1                 | (0.00)  | 1  |
| T1N2b                  | 77       | (29.96)      | 6/55           | (10.91)      | 62       | (80.52)      | 5/45           | (11.11)      | 15       | (19.48)      | 1/10                | (10.00) | 22 |
| T2N0                   | 26       | (10.12)      | 4/19           | (21.05)      | 10       | (38.46)      | 2/6            | (33.33)      | 16       | (61.54)      | 2/13                | (15.38) | 7  |
| T2N1                   | 17       | (6.61)       | 2/15           | (13.33)      | 11       | (64.71)      | 2/10           | (20.00)      | 6        | (35.29)      | 0/5                 | (0.00)  | 2  |
| T2N2a                  | 7        | (2.72)       | 2/7            | (28.57)      | 5        | (71.43)      | 2/5            | (40.00)      | 2        | (28.57)      | 0/2                 | (0.00)  | 0  |
| T2N2b                  | 76       | (29.57)      | 17/65          | (26.15)      | 66       | (86.84)      | 15/56          | (26.79)      | 10       | (13.16)      | 2/9                 | (22.22) | 11 |
| T3N0                   | 7        | (2.72)       | 3/7            | (42.86)      | 6        | (85.71)      | 3/6            | (50.00)      | 1        | (14.29)      | 0/1                 | (0.00)  | 10 |

\*Dysphagia assessment at 3 to 6 months post-treatment was missing for 50 study patients –16 (21%) in the TORS group and 34 (19%) in the RT group.
